# Supplementary material for: ntCard: a streaming algorithm for cardinality estimation in genomics data
Source: PubMed Central journal article supplement — Bioinformatics. 2017 Jan 5;33(9):1324–30. doi: 10.1093/bioinformatics/btw832 (PMC5408799; doi:10.1093/bioinformatics/btw832), 2017-01-05
Supplement: btw832_supp.pdf [file btw832_supp.pdf]

# ntCard: A streaming algorithm for cardinality estimation in genomics data

Hamid Mohamadi, Hamza Khan, Inanc Birol

Canada's Michael Smith Genome Sciences Centre, British Columbia Cancer Agency, Vancouver, BC, Canada  
University of British Columbia, Vancouver, BC, V6T 1Z4, Canada

## Supplementary Data

### Software comparison

We have compared ntCard with KmerGenie, KmerStream, Khmer and DSK algorithms. We have used KmerGenie version 1.7016, KmerStream version 1.1, Khmer version 2.0, DSK version 2.1.0, and ntCard version 1.0.0 in our experiments.

KmerGenie is first proposed method for estimating the full  $k$ -mer coverage frequencies histograms. It samples  $k$ -mers to approximate the frequency histogram of  $k$ -mer occurrences. It also offers a fast heuristic for putative  $k$  values to estimate the best possible value of  $k$ .

KmerStream is an algorithm for estimating the number of distinct  $k$ -mers,  $F_0$ , as well as the number of singletons,  $f_1$ , present in high-throughput sequencing data. The runtime of KmerStream is linear with the size of the input data and the space requirement is logarithmic in the size of the input.

Khmer is an open implementation of the HyperLogLog cardinality estimation sketch for  $k$ -mers implemented in C++ with a Python interface, and is distributed as part of the khmer software package. Khmer gives only the estimated number of distinct  $k$ -mers,  $F_0$ , in a dataset.

DSK is a disk-based streaming algorithm for  $k$ -mer counting which works by first partitioning and storing the multi-set of all  $k$ -mers present in the reads, and then loading and counting each partition separately.

All four tools are run with their default parameters, and the parameters related to the resource usage are set in a way to utilize the maximum capacity on each computing node as described in Supplementary Data. For example, all tools are run in multi-threaded mode with the maximum number of threads.

To run each tool, we used the following command:

- KmerGenie <http://kmergenie.bx.psu.edu/>  
`/usr/bin/time -v specialk <inputs> -k 128 -l 32 -s 32 -t 12 // multi k`  
`/usr/bin/time -v specialk <inputs> -k <int> -l <int> // single k`
- Khmer <https://github.com/dib-lab/khmer>  
`/usr/bin/time -v unique-kmers.py -k <int> <inputs>`  
-k: size of k-mer. We have used  $k=\{32,64,96,128\}$   
for the number of threads, we have set `OMP_NUM_THREADS=12`
- KmerStream: <https://github.com/pmelsted/KmerStream>  
`/usr/bin/time -v KmerStream -k <int> -t <int> -o <output> <inputs>`  
-k: size of k-mer. We have used  $k=\{32,64,96,128\}$   
-t: number of threads to use. We have used  $t=12$
- DSK: <http://minia.genouest.org/dsk/>  
`/usr/bin/time -v dsk -nb-cores <t> -kmer-size <int> -file <inputs> -out $output`  
-kmer-size: size of k-mer. We have used  $k=\{32,64,96,128\}$   
-nb-cores: number of cores. We have used  $t=12$
- ntCard: <https://github.com/bcgsc/ntCard>  
`/usr/bin/time -v ntcards -k <int> -t <int> <inputs>`  
-k: size of k-mer. We have used  $k=\{32,64,96,128\}$   
-t: number of threads to use. We have used  $t=12$

All details for using and running the ntCard tool have been explained in the github page:

<https://github.com/bcgsc/ntCard>

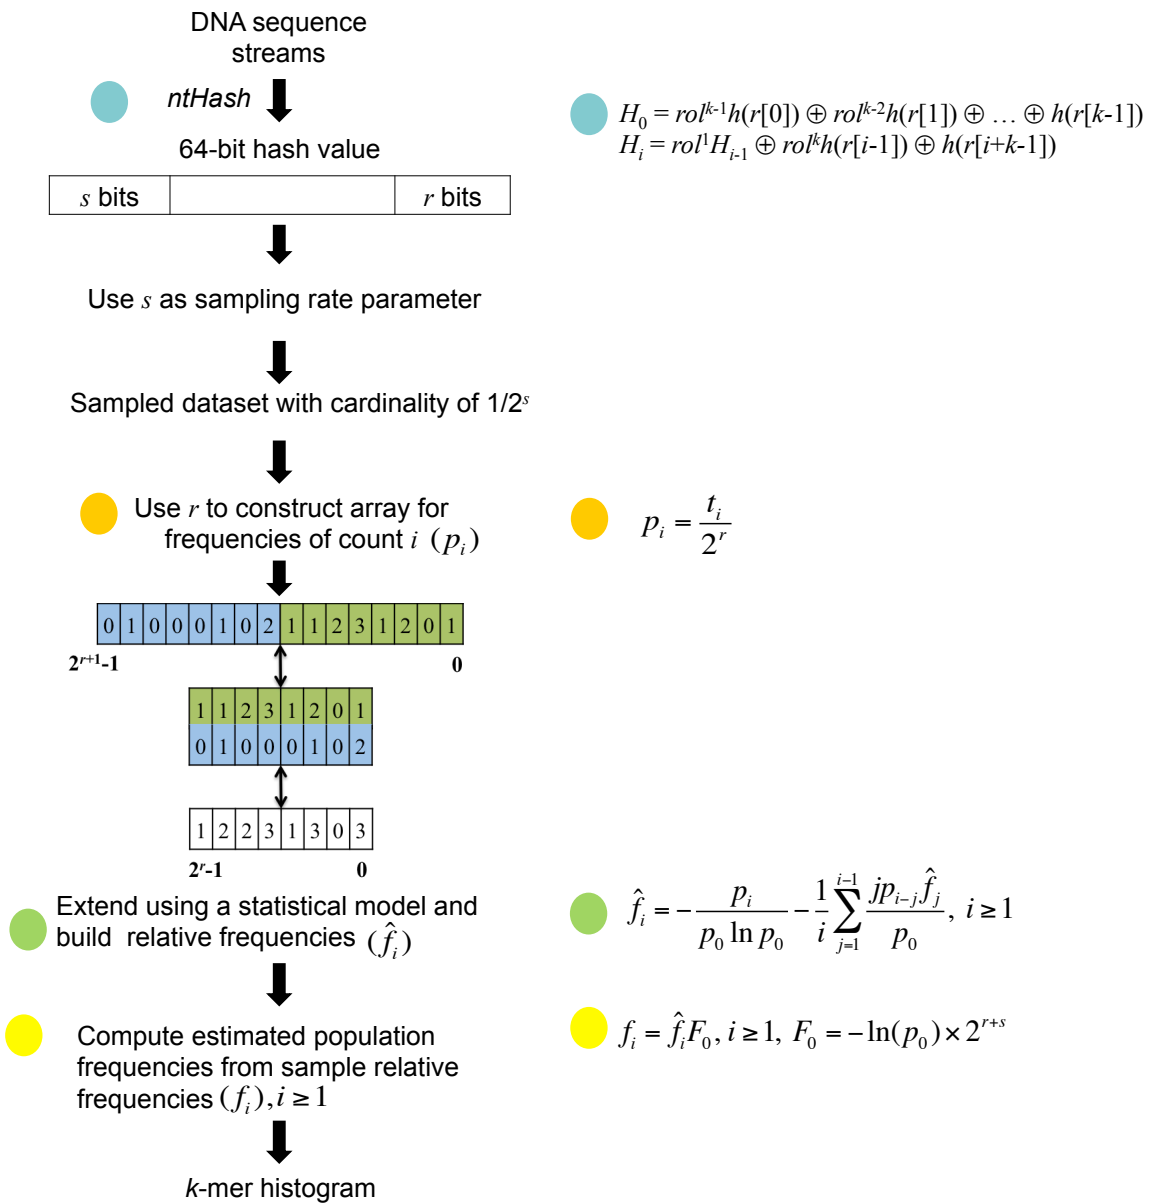

**Supplementary Figure 1.** The workflow of ntCard algorithm for estimating the *k*-mer coverage frequencies and the total number of distinct *k*-mers in DNA sequence streams.

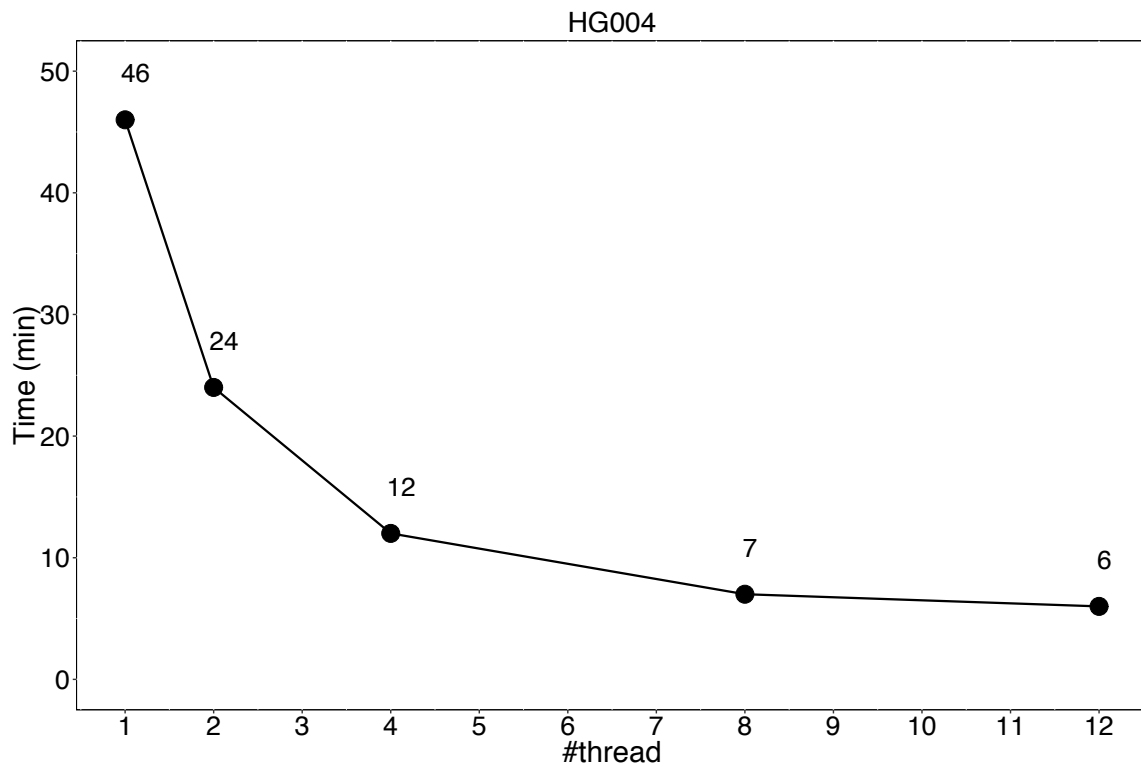

**Supplementary Figure 2.** The runtime of ntCard algorithm with different number of threads for HG004 dataset and  $k=64$ .

**Supp. Table 1.**  $F_0$  and  $f_l$  of different algorithms for HG004.

| $k$ |       | DSK            | ntCard         | err% | KmerGenie      | err% | KmerStream     | err% | Khmer          | err% |
|-----|-------|----------------|----------------|------|----------------|------|----------------|------|----------------|------|
| 32  | $f_l$ | 13,319,957,567 | 13,319,064,830 | 0.01 | 13,449,549,282 | 0.97 | 12,382,028,923 | 7.04 | -              | -    |
|     | $F_0$ | 16,539,753,749 | 16,536,020,926 | 0.02 | 16,645,716,258 | 0.64 | 15,692,266,031 | 5.12 | 16,650,898,471 | 0.67 |
| 64  | $f_l$ | 17,898,672,342 | 17,902,301,273 | 0.02 | 17,961,523,300 | 0.35 | 17,767,155,271 | 0.73 | -              | -    |
|     | $F_0$ | 21,343,659,785 | 21,343,785,902 | 0.00 | 21,391,489,196 | 0.22 | 21,203,285,348 | 0.66 | 21,375,310,744 | 0.15 |
| 96  | $f_l$ | 18,827,062,018 | 18,759,470,914 | 0.36 | 18,990,183,057 | 0.87 | 18,827,278,899 | 0.00 | -              | -    |
|     | $F_0$ | 22,313,944,415 | 22,260,048,925 | 0.24 | 22,467,161,829 | 0.69 | 22,324,811,221 | 0.05 | 22,244,672,164 | 0.31 |
| 128 | $f_l$ | 18,091,241,186 | 18,026,093,555 | 0.36 | 18,228,874,975 | 0.76 | 18,018,922,859 | 0.40 | -              | -    |
|     | $F_0$ | 21,555,678,676 | 21,501,437,324 | 0.25 | 21,688,723,775 | 0.62 | 21,513,520,195 | 0.20 | 21,620,187,510 | 0.30 |

**Supp. Table 2.**  $F_0$  and  $f_l$  of different algorithms for NA19238.

| $k$ |       | DSK            | ntCard         | err% | KmerGenie      | err% | KmerStream     | err% | Khmer          | err% |
|-----|-------|----------------|----------------|------|----------------|------|----------------|------|----------------|------|
| 32  | $f_l$ | 14,881,561,565 | 14,881,680,570 | 0.00 | 14,960,406,900 | 0.53 | 13,934,516,684 | 6.36 | -              | -    |
|     | $F_0$ | 18,091,801,391 | 18,091,827,603 | 0.00 | 18,163,642,050 | 0.40 | 17,251,954,617 | 4.64 | 18,421,615,787 | 1.82 |
| 64  | $f_l$ | 19,074,667,480 | 19,078,850,494 | 0.02 | 19,217,432,098 | 0.75 | 18,945,178,784 | 0.68 | -              | -    |
|     | $F_0$ | 22,527,419,136 | 22,530,412,581 | 0.01 | 22,700,537,032 | 0.77 | 22,381,144,183 | 0.65 | 22,802,557,178 | 1.22 |
| 96  | $f_l$ | 19,420,503,673 | 19,376,931,559 | 0.22 | 19,548,508,320 | 0.66 | 19,437,405,253 | 0.09 | -              | -    |
|     | $F_0$ | 22,932,238,161 | 22,896,217,215 | 0.16 | 23,082,721,560 | 0.66 | 22,915,649,020 | 0.07 | 23,038,122,134 | 0.46 |
| 128 | $f_l$ | 17,902,027,438 | 17,864,030,547 | 0.21 | 18,053,843,452 | 0.85 | 17,935,913,335 | 0.19 | -              | -    |
|     | $F_0$ | 21,421,517,759 | 21,393,328,674 | 0.13 | 21,583,356,391 | 0.76 | 21,414,422,860 | 0.03 | 21,646,674,001 | 1.05 |

**Supp. Table 3.**  $F_0$  and  $f_l$  of different algorithms for PG29.

| $k$ |       | DSK            | ntCard         | err% | KmerGenie      | err%  | KmerStream     | err% | Khmer          | err%  |
|-----|-------|----------------|----------------|------|----------------|-------|----------------|------|----------------|-------|
| 32  | $f_l$ | 27,430,910,938 | 27,426,448,310 | 0.02 | 31,637,221,856 | 15.33 | 24,850,928,409 | 9.41 | -              | -     |
|     | $F_0$ | 42,642,198,777 | 42,637,044,318 | 0.01 | 47,339,924,096 | 11.02 | 39,500,595,213 | 7.37 | 46,420,237,663 | 8.86  |
| 64  | $f_l$ | 44,344,130,469 | 44,359,962,143 | 0.04 | 51,598,993,212 | 16.36 | 43,186,071,050 | 2.61 | -              | -     |
|     | $F_0$ | 67,800,291,613 | 67,816,101,981 | 0.02 | 75,351,916,016 | 11.14 | 66,626,955,212 | 1.73 | 75,382,499,931 | 11.18 |
| 96  | $f_l$ | 43,300,244,443 | 43,015,754,808 | 0.66 | 50,880,746,585 | 17.51 | 42,983,262,871 | 0.73 | -              | -     |
|     | $F_0$ | 69,855,690,006 | 69,535,745,007 | 0.46 | 77,627,984,210 | 11.13 | 69,455,435,699 | 0.57 | 76,394,432,529 | 9.36  |
| 128 | $f_l$ | 32,089,613,024 | 31,961,397,892 | 0.40 | 36,846,185,246 | 14.82 | 32,069,861,651 | 0.06 | -              | -     |
|     | $F_0$ | 58,195,246,941 | 58,022,167,722 | 0.30 | 63,055,303,509 | 8.35  | 58,038,850,303 | 0.27 | 62,498,531,497 | 7.39  |

**Supp. Table 4.** The  $k$ -mer frequencies of DSK, ntCard, and KmerGenie for  $k=32$  for HG004.

| $f$ | DSK            | ntCard         | Error% | KmerGenie      | Error% |
|-----|----------------|----------------|--------|----------------|--------|
| 1   | 13,319,957,567 | 13,319,064,830 | 0.01   | 13,449,549,282 | 0.97   |
| 2   | 467,744,995    | 465,412,740    | 0.50   | 469,104,456    | 0.29   |
| 3   | 73,943,396     | 74,147,705     | 0.28   | 70,899,240     | 4.12   |
| 4   | 29,741,793     | 29,885,180     | 0.48   | 29,748,444     | 0.02   |
| 5   | 16,256,725     | 16,291,021     | 0.21   | 16,299,516     | 0.26   |
| 6   | 10,375,102     | 10,463,788     | 0.85   | 9,684,690      | 6.65   |
| 7   | 7,311,138      | 7,294,592      | 0.23   | 7,491,930      | 2.47   |
| 8   | 5,577,512      | 5,602,832      | 0.45   | 5,299,170      | 4.99   |
| 9   | 4,528,486      | 4,494,946      | 0.74   | 4,056,606      | 10.42  |
| 10  | 3,900,724      | 3,783,827      | 3.00   | 3,873,876      | 0.69   |
| 11  | 3,554,869      | 3,619,298      | 1.81   | 3,033,318      | 14.67  |
| 12  | 3,391,536      | 3,420,913      | 0.87   | 3,252,594      | 4.10   |
| 13  | 3,388,829      | 3,486,498      | 2.88   | 4,129,698      | 21.86  |
| 14  | 3,524,600      | 3,602,339      | 2.21   | 3,508,416      | 0.46   |
| 15  | 3,786,332      | 3,687,941      | 2.60   | 3,325,686      | 12.17  |
| 16  | 4,173,083      | 4,124,531      | 1.16   | 3,837,330      | 8.05   |
| 17  | 4,653,875      | 4,809,006      | 3.33   | 4,166,244      | 10.48  |
| 18  | 5,258,640      | 5,314,146      | 1.06   | 5,956,998      | 13.28  |
| 19  | 5,954,594      | 5,955,551      | 0.02   | 6,541,734      | 9.86   |
| 20  | 6,719,630      | 6,734,972      | 0.23   | 6,505,188      | 3.19   |
| 21  | 7,526,843      | 7,583,123      | 0.75   | 7,053,378      | 6.29   |
| 22  | 8,349,288      | 8,476,467      | 1.52   | 7,272,654      | 12.89  |
| 23  | 9,174,841      | 9,094,423      | 0.88   | 9,392,322      | 2.37   |
| 24  | 9,954,313      | 9,991,480      | 0.37   | 10,488,702     | 5.37   |
| 25  | 10,672,410     | 10,848,587     | 1.65   | 11,438,898     | 7.18   |
| 26  | 11,327,187     | 11,163,564     | 1.44   | 10,744,524     | 5.14   |
| 27  | 11,904,008     | 11,884,563     | 0.16   | 13,266,198     | 11.44  |
| 28  | 12,377,312     | 12,336,112     | 0.33   | 13,375,836     | 8.07   |
| 29  | 12,803,476     | 12,730,166     | 0.57   | 12,352,548     | 3.52   |
| 30  | 13,189,709     | 13,249,488     | 0.45   | 12,498,732     | 5.24   |
| 31  | 13,576,611     | 13,681,116     | 0.77   | 12,316,002     | 9.29   |
| 32  | 13,984,009     | 14,019,853     | 0.26   | 13,120,014     | 6.18   |
| 33  | 14,515,075     | 14,392,451     | 0.84   | 15,093,498     | 3.98   |
| 34  | 15,187,602     | 15,214,149     | 0.17   | 15,897,510     | 4.67   |
| 35  | 16,049,070     | 16,090,314     | 0.26   | 15,751,326     | 1.86   |
| 36  | 17,191,798     | 17,368,703     | 1.03   | 18,053,724     | 5.01   |
| 37  | 18,594,400     | 18,664,946     | 0.38   | 18,784,644     | 1.02   |
| 38  | 20,346,073     | 20,405,263     | 0.29   | 19,698,294     | 3.18   |
| 39  | 22,451,820     | 22,334,024     | 0.52   | 22,402,698     | 0.22   |
| 40  | 24,930,053     | 24,912,887     | 0.07   | 23,206,710     | 6.91   |
| 41  | 27,788,584     | 27,590,644     | 0.71   | 27,336,408     | 1.63   |
| 42  | 31,043,301     | 31,237,138     | 0.62   | 28,798,248     | 7.23   |
| 43  | 34,643,415     | 34,467,024     | 0.51   | 35,778,534     | 3.28   |
| 44  | 38,542,699     | 38,703,775     | 0.42   | 38,848,398     | 0.79   |
| 45  | 42,743,785     | 42,473,213     | 0.63   | 43,745,562     | 2.34   |
| 46  | 47,106,429     | 47,048,948     | 0.12   | 45,755,592     | 2.87   |
| 47  | 51,651,062     | 51,243,087     | 0.79   | 49,885,290     | 3.42   |
| 48  | 56,215,439     | 56,442,476     | 0.40   | 57,742,680     | 2.72   |
| 49  | 60,709,080     | 61,022,233     | 0.52   | 62,822,574     | 3.48   |
| 50  | 65,085,342     | 65,234,680     | 0.23   | 63,041,850     | 3.14   |
| 51  | 69,158,889     | 69,237,094     | 0.11   | 66,769,542     | 3.45   |
| 52  | 72,909,204     | 72,811,430     | 0.13   | 74,590,386     | 2.31   |
| 53  | 76,249,148     | 77,282,685     | 1.36   | 77,440,974     | 1.56   |
| 54  | 79,031,938     | 79,060,515     | 0.04   | 78,756,630     | 0.35   |
| 55  | 81,237,214     | 81,228,764     | 0.01   | 80,328,108     | 1.12   |
| 56  | 82,745,999     | 82,655,892     | 0.11   | 84,640,536     | 2.29   |
| 57  | 83,612,261     | 83,434,547     | 0.21   | 83,215,242     | 0.47   |
| 58  | 83,751,485     | 83,245,025     | 0.60   | 82,118,862     | 1.95   |
| 59  | 83,159,954     | 83,126,450     | 0.04   | 78,975,906     | 5.03   |
| 60  | 81,934,177     | 82,303,951     | 0.45   | 81,753,402     | 0.22   |
| 61  | 80,073,943     | 80,269,408     | 0.24   | 78,683,538     | 1.74   |
| 62  | 77,588,136     | 77,424,998     | 0.21   | 75,065,484     | 3.25   |
| 63  | 74,560,903     | 74,124,434     | 0.59   | 75,065,484     | 0.68   |
|     |                | AVG            | 0.71   | AVG            | 4.67   |
|     |                | MAX            | 3.33   | MAX            | 21.86  |
|     |                | STDEV          | 0.75   | STDEV          | 4.25   |

**Supp. Table 5.** The  $k$ -mer frequencies of DSK, ntCard, and KmerGenie for  $k=64$  for HG004.

| $f$ | DSK            | ntCard         | Error% | KmerGenie      | Error% |
|-----|----------------|----------------|--------|----------------|--------|
| 1   | 17,898,672,342 | 17,902,301,273 | 0.02   | 17,961,523,300 | 0.35   |
| 2   | 425,210,274    | 423,017,210    | 0.52   | 418,128,760    | 1.67   |
| 3   | 45,477,794     | 45,746,222     | 0.59   | 46,452,686     | 2.14   |
| 4   | 19,144,838     | 18,937,917     | 1.08   | 17,958,794     | 6.20   |
| 5   | 11,958,180     | 11,903,262     | 0.46   | 11,899,748     | 0.49   |
| 6   | 9,121,360      | 9,155,191      | 0.37   | 8,242,486      | 9.64   |
| 7   | 7,846,906      | 8,055,976      | 2.66   | 8,788,346      | 12.00  |
| 8   | 7,333,695      | 7,247,456      | 1.18   | 7,642,040      | 4.20   |
| 9   | 7,284,623      | 7,186,888      | 1.34   | 6,604,906      | 9.33   |
| 10  | 7,597,916      | 7,443,433      | 2.03   | 8,078,728      | 6.33   |
| 11  | 8,235,423      | 8,418,635      | 2.22   | 7,205,352      | 12.51  |
| 12  | 9,158,205      | 9,058,918      | 1.08   | 9,497,964      | 3.71   |
| 13  | 10,384,899     | 10,144,290     | 2.32   | 9,825,480      | 5.39   |
| 14  | 11,867,027     | 12,119,538     | 2.13   | 12,118,092     | 2.12   |
| 15  | 13,600,342     | 13,766,981     | 1.23   | 14,574,462     | 7.16   |
| 16  | 15,523,649     | 15,589,840     | 0.43   | 15,284,080     | 1.54   |
| 17  | 17,487,930     | 17,585,082     | 0.56   | 16,867,074     | 3.55   |
| 18  | 19,502,937     | 19,850,141     | 1.78   | 18,777,584     | 3.72   |
| 19  | 21,402,313     | 21,507,263     | 0.49   | 20,360,578     | 4.87   |
| 20  | 23,143,255     | 22,973,404     | 0.73   | 22,980,706     | 0.70   |
| 21  | 24,631,535     | 24,695,847     | 0.26   | 25,109,560     | 1.94   |
| 22  | 25,844,323     | 25,720,200     | 0.48   | 23,854,082     | 7.70   |
| 23  | 26,691,911     | 26,745,395     | 0.20   | 26,965,484     | 1.02   |
| 24  | 27,310,634     | 27,106,050     | 0.75   | 25,600,834     | 6.26   |
| 25  | 27,771,164     | 27,795,475     | 0.09   | 26,637,968     | 4.08   |
| 26  | 28,133,388     | 28,083,788     | 0.18   | 28,875,994     | 2.64   |
| 27  | 28,536,498     | 28,854,172     | 1.11   | 26,801,726     | 6.08   |
| 28  | 29,134,718     | 28,756,361     | 1.30   | 28,111,790     | 3.51   |
| 29  | 30,061,533     | 30,147,800     | 0.29   | 29,258,096     | 2.67   |
| 30  | 31,403,533     | 31,267,409     | 0.43   | 31,168,606     | 0.75   |
| 31  | 33,290,402     | 33,395,082     | 0.31   | 34,061,664     | 2.32   |
| 32  | 35,800,114     | 35,929,984     | 0.36   | 36,518,034     | 2.01   |
| 33  | 38,939,624     | 38,708,653     | 0.59   | 39,738,608     | 2.05   |
| 34  | 42,727,141     | 42,798,669     | 0.17   | 41,212,430     | 3.55   |
| 35  | 47,162,523     | 47,113,651     | 0.10   | 49,072,814     | 4.05   |
| 36  | 52,090,544     | 51,963,573     | 0.24   | 50,601,222     | 2.86   |
| 37  | 57,451,529     | 57,294,360     | 0.27   | 57,151,542     | 0.52   |
| 38  | 63,135,037     | 62,801,854     | 0.53   | 63,374,346     | 0.38   |
| 39  | 68,967,803     | 68,581,102     | 0.56   | 70,907,214     | 2.81   |
| 40  | 74,824,311     | 75,333,697     | 0.68   | 75,492,438     | 0.89   |
| 41  | 80,454,765     | 80,009,672     | 0.55   | 78,167,152     | 2.84   |
| 42  | 85,662,236     | 85,757,383     | 0.11   | 85,536,262     | 0.15   |
| 43  | 90,292,834     | 89,775,629     | 0.57   | 87,774,288     | 2.79   |
| 44  | 94,229,665     | 94,029,842     | 0.21   | 95,907,602     | 1.78   |
| 45  | 97,307,760     | 97,248,143     | 0.06   | 95,634,672     | 1.72   |
| 46  | 99,425,946     | 99,245,980     | 0.18   | 95,197,984     | 4.25   |
| 47  | 100,486,631    | 100,610,511    | 0.12   | 99,401,106     | 1.08   |
| 48  | 100,487,959    | 100,516,183    | 0.03   | 101,584,546    | 1.09   |
| 49  | 99,453,087     | 99,857,057     | 0.41   | 100,165,310    | 0.72   |
| 50  | 97,414,816     | 97,512,598     | 0.10   | 97,654,354     | 0.25   |
| 51  | 94,420,033     | 94,608,349     | 0.20   | 91,486,136     | 3.11   |
| 52  | 90,524,915     | 89,962,073     | 0.62   | 88,210,976     | 2.56   |
| 53  | 85,901,801     | 85,560,132     | 0.40   | 88,702,250     | 3.26   |
| 54  | 80,768,953     | 81,226,974     | 0.57   | 82,370,274     | 1.98   |
| 55  | 75,198,438     | 74,912,463     | 0.38   | 75,929,126     | 0.97   |
| 56  | 69,309,095     | 69,741,037     | 0.62   | 72,271,864     | 4.27   |
| 57  | 63,249,041     | 63,141,770     | 0.17   | 64,793,582     | 2.44   |
| 58  | 57,205,752     | 57,283,831     | 0.14   | 57,042,370     | 0.29   |
| 59  | 51,271,898     | 51,236,860     | 0.07   | 53,385,108     | 4.12   |
| 60  | 45,558,129     | 45,107,723     | 0.99   | 44,542,176     | 2.23   |
| 61  | 40,116,358     | 40,337,323     | 0.55   | 40,884,914     | 1.92   |
| 62  | 35,019,734     | 34,782,012     | 0.68   | 34,880,454     | 0.40   |
| 63  | 30,323,191     | 30,735,262     | 1.36   | 29,913,128     | 1.35   |
|     |                | AVG            | 0.65   | AVG            | 3.19   |
|     |                | MAX            | 2.66   | MAX            | 12.51  |
|     |                | STDEV          | 0.61   | STDEV          | 2.71   |

**Supp. Table 6.** The  $k$ -mer frequencies of DSK, ntCard, and KmerGenie for  $k=96$  for HG004.

| $f$ | DSK            | ntCard         | Error% | KmerGenie      | Error% |
|-----|----------------|----------------|--------|----------------|--------|
| 1   | 18,827,062,018 | 18,759,470,914 | 0.36   | 18,990,183,057 | 0.87   |
| 2   | 364,383,376    | 380,907,398    | 4.53   | 366,562,350    | 0.60   |
| 3   | 38,522,680     | 39,379,048     | 2.22   | 38,719,140     | 0.51   |
| 4   | 19,759,875     | 19,677,230     | 0.42   | 20,057,784     | 1.51   |
| 5   | 14,876,194     | 14,741,074     | 0.91   | 15,106,812     | 1.55   |
| 6   | 13,321,524     | 13,146,118     | 1.32   | 14,567,283     | 9.35   |
| 7   | 13,168,741     | 12,957,215     | 1.61   | 14,725,968     | 11.83  |
| 8   | 13,945,693     | 13,967,026     | 0.15   | 14,186,439     | 1.73   |
| 9   | 15,481,368     | 15,470,269     | 0.07   | 14,948,127     | 3.44   |
| 10  | 17,677,466     | 17,561,916     | 0.65   | 16,725,399     | 5.39   |
| 11  | 20,499,684     | 20,305,119     | 0.95   | 19,581,729     | 4.48   |
| 12  | 23,827,848     | 23,741,318     | 0.36   | 23,802,750     | 0.11   |
| 13  | 27,490,572     | 27,264,398     | 0.82   | 28,372,878     | 3.21   |
| 14  | 31,203,519     | 31,150,309     | 0.17   | 30,562,731     | 2.05   |
| 15  | 34,726,379     | 34,703,961     | 0.06   | 34,339,434     | 1.11   |
| 16  | 37,858,509     | 37,662,276     | 0.52   | 36,878,394     | 2.59   |
| 17  | 40,347,051     | 40,206,576     | 0.35   | 40,559,886     | 0.53   |
| 18  | 42,196,442     | 41,916,239     | 0.66   | 42,114,999     | 0.19   |
| 19  | 43,413,257     | 43,456,106     | 0.10   | 42,718,002     | 1.60   |
| 20  | 44,133,270     | 44,169,683     | 0.08   | 43,352,742     | 1.77   |
| 21  | 44,639,674     | 44,465,290     | 0.39   | 45,161,751     | 1.17   |
| 22  | 45,173,198     | 45,292,639     | 0.26   | 43,797,060     | 3.05   |
| 23  | 46,026,846     | 46,163,795     | 0.30   | 45,955,176     | 0.16   |
| 24  | 47,484,551     | 47,345,448     | 0.29   | 45,955,176     | 3.22   |
| 25  | 49,790,722     | 50,441,108     | 1.31   | 50,842,674     | 2.11   |
| 26  | 53,082,441     | 52,917,255     | 0.31   | 52,048,680     | 1.95   |
| 27  | 57,347,549     | 57,207,094     | 0.24   | 57,126,600     | 0.39   |
| 28  | 62,580,703     | 62,227,109     | 0.57   | 59,506,875     | 4.91   |
| 29  | 68,712,341     | 68,768,798     | 0.08   | 70,392,666     | 2.45   |
| 30  | 75,439,537     | 75,160,042     | 0.37   | 72,931,626     | 3.32   |
| 31  | 82,547,612     | 82,707,528     | 0.19   | 82,071,882     | 0.58   |
| 32  | 89,665,503     | 89,682,216     | 0.02   | 91,434,297     | 1.97   |
| 33  | 96,403,135     | 95,906,163     | 0.52   | 96,448,743     | 0.05   |
| 34  | 102,464,581    | 102,793,524    | 0.32   | 105,811,158    | 3.27   |
| 35  | 107,605,600    | 107,896,266    | 0.27   | 105,588,999    | 1.87   |
| 36  | 111,537,592    | 111,434,283    | 0.09   | 110,857,341    | 0.61   |
| 37  | 114,010,516    | 113,556,158    | 0.40   | 111,777,714    | 1.96   |
| 38  | 115,008,537    | 115,168,374    | 0.14   | 113,523,249    | 1.29   |
| 39  | 114,372,770    | 114,509,176    | 0.12   | 114,824,466    | 0.39   |
| 40  | 112,278,189    | 112,006,610    | 0.24   | 110,666,919    | 1.44   |
| 41  | 108,653,683    | 108,514,719    | 0.13   | 106,636,320    | 1.86   |
| 42  | 103,746,398    | 102,991,163    | 0.73   | 107,302,797    | 3.43   |
| 43  | 97,758,925     | 97,520,670     | 0.24   | 98,575,122     | 0.83   |
| 44  | 90,916,492     | 91,331,973     | 0.46   | 89,117,496     | 1.98   |
| 45  | 83,491,510     | 83,301,003     | 0.23   | 82,484,463     | 1.21   |
| 46  | 75,725,271     | 75,671,548     | 0.07   | 74,804,109     | 1.22   |
| 47  | 67,835,317     | 67,547,180     | 0.42   | 68,361,498     | 0.78   |
| 48  | 60,058,097     | 60,326,170     | 0.45   | 61,379,358     | 2.20   |
| 49  | 52,534,126     | 52,208,347     | 0.62   | 54,460,692     | 3.67   |
| 50  | 45,487,185     | 45,501,591     | 0.03   | 47,065,971     | 3.47   |
| 51  | 38,930,851     | 38,500,346     | 1.11   | 38,211,348     | 1.85   |
| 52  | 32,961,136     | 32,800,912     | 0.49   | 31,578,315     | 4.20   |
| 53  | 27,639,650     | 27,774,175     | 0.49   | 27,611,190     | 0.10   |
| 54  | 22,921,533     | 23,281,287     | 1.57   | 21,993,741     | 4.05   |
| 55  | 18,849,865     | 19,074,113     | 1.19   | 18,121,827     | 3.86   |
| 56  | 15,362,405     | 15,347,634     | 0.10   | 15,265,497     | 0.63   |
| 57  | 12,433,625     | 12,097,706     | 2.70   | 11,647,479     | 6.32   |
| 58  | 9,993,725      | 9,932,056      | 0.62   | 9,489,363      | 5.05   |
| 59  | 7,984,024      | 8,025,887      | 0.52   | 7,267,773      | 8.97   |
| 60  | 6,369,514      | 6,419,329      | 0.78   | 7,077,351      | 11.11  |
| 61  | 5,057,240      | 5,070,371      | 0.26   | 5,173,131      | 2.29   |
| 62  | 4,019,929      | 3,812,763      | 5.15   | 4,094,073      | 1.84   |
| 63  | 3,207,122      | 3,244,020      | 1.15   | 2,951,541      | 7.97   |
|     |                | AVG            | 0.67   | AVG            | 2.69   |
|     |                | MAX            | 5.15   | MAX            | 11.83  |
|     |                | STDEV          | 0.92   | STDEV          | 2.57   |

**Supp. Table 7.** The  $k$ -mer frequencies of DSK, ntCard, and KmerGenie for  $k=128$  for HG004.

| $f$ | DSK            | ntCard         | Error% | KmerGenie      | Error% |
|-----|----------------|----------------|--------|----------------|--------|
| 1   | 18,091,241,186 | 18,026,093,555 | 0.36   | 18,228,874,975 | 0.76   |
| 2   | 286,591,196    | 300,475,705    | 4.84   | 286,456,325    | 0.05   |
| 3   | 38,287,043     | 38,004,181     | 0.74   | 39,383,700     | 2.86   |
| 4   | 25,321,209     | 25,348,406     | 0.11   | 26,718,050     | 5.52   |
| 5   | 23,084,968     | 22,952,712     | 0.57   | 25,192,625     | 9.13   |
| 6   | 24,295,945     | 23,890,280     | 1.67   | 27,041,625     | 11.30  |
| 7   | 27,512,908     | 27,433,445     | 0.29   | 28,428,375     | 3.33   |
| 8   | 32,339,046     | 32,021,521     | 0.98   | 32,496,175     | 0.49   |
| 9   | 38,278,476     | 38,310,428     | 0.08   | 37,950,725     | 0.86   |
| 10  | 44,842,419     | 44,381,312     | 1.03   | 44,976,925     | 0.30   |
| 11  | 51,209,265     | 51,241,319     | 0.06   | 53,805,900     | 5.07   |
| 12  | 56,903,226     | 56,821,766     | 0.14   | 56,902,975     | 0.00   |
| 13  | 61,337,926     | 61,013,338     | 0.53   | 60,878,325     | 0.75   |
| 14  | 64,516,172     | 64,194,305     | 0.50   | 63,328,250     | 1.84   |
| 15  | 66,576,770     | 66,078,399     | 0.75   | 65,500,825     | 1.62   |
| 16  | 67,955,844     | 67,699,264     | 0.38   | 67,164,925     | 1.16   |
| 17  | 69,254,289     | 68,852,350     | 0.58   | 71,417,625     | 3.12   |
| 18  | 71,112,303     | 70,571,406     | 0.76   | 69,245,050     | 2.63   |
| 19  | 73,996,495     | 74,244,115     | 0.33   | 74,745,825     | 1.01   |
| 20  | 78,307,378     | 78,493,159     | 0.24   | 75,716,550     | 3.31   |
| 21  | 84,072,159     | 83,546,762     | 0.62   | 84,268,175     | 0.23   |
| 22  | 91,249,272     | 91,632,330     | 0.42   | 88,798,225     | 2.69   |
| 23  | 99,258,260     | 99,789,513     | 0.54   | 100,770,500    | 1.52   |
| 24  | 107,661,409    | 107,328,674    | 0.31   | 109,460,800    | 1.67   |
| 25  | 115,775,221    | 115,776,962    | 0.00   | 115,423,825    | 0.30   |
| 26  | 123,010,263    | 122,813,398    | 0.16   | 126,471,600    | 2.81   |
| 27  | 128,703,377    | 129,343,339    | 0.50   | 127,627,225    | 0.84   |
| 28  | 132,397,532    | 132,851,710    | 0.34   | 135,670,375    | 2.47   |
| 29  | 133,785,647    | 133,545,333    | 0.18   | 132,342,175    | 1.08   |
| 30  | 132,717,572    | 133,133,364    | 0.31   | 130,262,050    | 1.85   |
| 31  | 129,296,123    | 129,219,388    | 0.06   | 129,337,550    | 0.03   |
| 32  | 123,666,497    | 123,208,303    | 0.37   | 120,369,900    | 2.67   |
| 33  | 116,190,833    | 116,180,879    | 0.01   | 115,238,925    | 0.82   |
| 34  | 107,240,930    | 107,317,833    | 0.07   | 109,876,825    | 2.46   |
| 35  | 97,269,590     | 97,037,747     | 0.24   | 96,055,550     | 1.25   |
| 36  | 86,763,354     | 86,637,489     | 0.15   | 86,440,750     | 0.37   |
| 37  | 76,124,708     | 75,705,337     | 0.55   | 75,023,175     | 1.45   |
| 38  | 65,719,489     | 65,206,114     | 0.78   | 64,391,425     | 2.02   |
| 39  | 55,867,931     | 56,475,697     | 1.09   | 52,095,575     | 6.75   |
| 40  | 46,833,006     | 47,146,479     | 0.67   | 46,733,475     | 0.21   |
| 41  | 38,675,198     | 38,560,855     | 0.30   | 37,950,725     | 1.87   |
| 42  | 31,528,100     | 31,421,169     | 0.34   | 29,907,575     | 5.14   |
| 43  | 25,365,737     | 25,138,120     | 0.90   | 26,209,575     | 3.33   |
| 44  | 20,177,895     | 20,045,382     | 0.66   | 21,078,600     | 4.46   |
| 45  | 15,875,304     | 15,734,925     | 0.88   | 14,653,325     | 7.70   |
| 46  | 12,371,042     | 12,495,347     | 1.00   | 12,896,775     | 4.25   |
| 47  | 9,573,864      | 9,599,577      | 0.27   | 8,782,750      | 8.26   |
| 48  | 7,366,628      | 7,445,455      | 1.07   | 6,979,975      | 5.25   |
| 49  | 5,655,990      | 5,595,614      | 1.07   | 7,026,200      | 24.23  |
| 50  | 4,347,667      | 4,492,919      | 3.34   | 4,345,150      | 0.06   |
| 51  | 3,360,066      | 3,375,011      | 0.44   | 3,050,850      | 9.20   |
| 52  | 2,625,573      | 2,554,379      | 2.71   | 2,357,475      | 10.21  |
| 53  | 2,083,598      | 2,116,757      | 1.59   | 2,126,350      | 2.05   |
| 54  | 1,681,123      | 1,750,398      | 4.12   | 2,033,900      | 20.98  |
| 55  | 1,395,577      | 1,429,632      | 2.44   | 1,248,075      | 10.57  |
| 56  | 1,191,564      | 1,171,118      | 1.72   | 1,155,625      | 3.02   |
| 57  | 1,040,954      | 1,076,580      | 3.42   | 832,050        | 20.07  |
| 58  | 933,777        | 896,995        | 3.94   | 878,275        | 5.94   |
| 59  | 851,983        | 928,788        | 9.01   | 647,150        | 24.04  |
| 60  | 792,057        | 859,154        | 8.47   | 508,475        | 35.80  |
| 61  | 746,048        | 776,320        | 4.06   | 739,600        | 0.86   |
| 62  | 706,560        | 684,781        | 3.08   | 832,050        | 17.76  |
| 63  | 674,729        | 672,624        | 0.31   | 647,150        | 4.09   |
|     |                | AVG            | 1.23   | AVG            | 5.04   |
|     |                | MAX            | 9.01   | MAX            | 35.80  |
|     |                | STDEV          | 1.78   | STDEV          | 6.93   |



**Supp. Table 8.** The  $k$ -mer frequencies of DSK, ntCard, and KmerGenie for  $k=32$  for NA19238.

| $f$ | DSK            | ntCard         | Error% | KmerGenie      | Error% |
|-----|----------------|----------------|--------|----------------|--------|
| 1   | 14,881,561,570 | 14,881,680,570 | 0.00   | 14,960,406,900 | 0.53   |
| 2   | 405,294,833    | 405,870,945    | 0.14   | 408,437,250    | 0.78   |
| 3   | 87,649,181     | 88,094,633     | 0.51   | 87,238,650     | 0.47   |
| 4   | 36,397,950     | 36,302,248     | 0.26   | 37,624,800     | 3.37   |
| 5   | 19,625,684     | 19,430,042     | 1.00   | 19,776,150     | 0.77   |
| 6   | 12,250,635     | 12,445,638     | 1.59   | 12,181,800     | 0.56   |
| 7   | 8,467,205      | 8,457,218      | 0.12   | 9,444,750      | 11.55  |
| 8   | 6,332,362      | 6,326,466      | 0.09   | 5,898,150      | 6.86   |
| 9   | 5,095,252      | 5,157,660      | 1.22   | 5,050,050      | 0.89   |
| 10  | 4,367,422      | 4,268,113      | 2.27   | 3,585,150      | 17.91  |
| 11  | 3,968,846      | 4,005,773      | 0.93   | 4,086,300      | 2.96   |
| 12  | 3,816,920      | 3,730,057      | 2.28   | 3,893,550      | 2.01   |
| 13  | 3,836,458      | 3,819,939      | 0.43   | 3,816,450      | 0.52   |
| 14  | 4,034,019      | 4,127,634      | 2.32   | 3,970,650      | 1.57   |
| 15  | 4,341,913      | 4,278,647      | 1.46   | 4,510,350      | 3.88   |
| 16  | 4,770,550      | 4,673,142      | 2.04   | 4,510,350      | 5.45   |
| 17  | 5,307,180      | 5,197,594      | 2.06   | 5,859,600      | 10.41  |
| 18  | 5,947,594      | 5,971,017      | 0.39   | 5,898,150      | 0.83   |
| 19  | 6,680,507      | 6,815,319      | 2.02   | 6,630,600      | 0.75   |
| 20  | 7,467,442      | 7,552,547      | 1.14   | 8,288,250      | 10.99  |
| 21  | 8,300,384      | 8,291,009      | 0.11   | 8,018,400      | 3.40   |
| 22  | 9,169,621      | 9,197,086      | 0.30   | 9,830,250      | 7.20   |
| 23  | 10,087,635     | 10,114,223     | 0.26   | 9,444,750      | 6.37   |
| 24  | 11,004,000     | 10,991,278     | 0.12   | 11,989,050     | 8.95   |
| 25  | 11,939,170     | 11,916,737     | 0.19   | 12,104,700     | 1.39   |
| 26  | 12,867,280     | 12,916,637     | 0.38   | 12,798,600     | 0.53   |
| 27  | 13,791,966     | 13,959,434     | 1.21   | 13,261,200     | 3.85   |
| 28  | 14,693,209     | 14,920,920     | 1.55   | 13,608,150     | 7.38   |
| 29  | 15,594,017     | 15,585,832     | 0.05   | 16,229,550     | 4.08   |
| 30  | 16,488,472     | 16,423,628     | 0.39   | 17,308,950     | 4.98   |
| 31  | 17,384,080     | 17,682,208     | 1.71   | 17,501,700     | 0.68   |
| 32  | 18,278,596     | 18,057,692     | 1.21   | 18,619,650     | 1.87   |
| 33  | 19,197,614     | 19,224,634     | 0.14   | 18,928,050     | 1.40   |
| 34  | 20,161,215     | 20,025,782     | 0.67   | 18,696,750     | 7.26   |
| 35  | 21,196,987     | 21,264,560     | 0.32   | 21,626,550     | 2.03   |
| 36  | 22,278,480     | 22,285,582     | 0.03   | 20,971,200     | 5.87   |
| 37  | 23,476,956     | 23,459,698     | 0.07   | 22,783,050     | 2.96   |
| 38  | 24,743,059     | 24,868,625     | 0.51   | 24,633,450     | 0.44   |
| 39  | 26,133,764     | 25,889,915     | 0.93   | 23,708,250     | 9.28   |
| 40  | 27,615,937     | 27,508,061     | 0.39   | 26,445,300     | 4.24   |
| 41  | 29,202,727     | 28,699,007     | 1.72   | 29,991,900     | 2.70   |
| 42  | 30,922,553     | 30,969,643     | 0.15   | 32,497,650     | 5.09   |
| 43  | 32,742,127     | 32,901,019     | 0.49   | 33,153,000     | 1.25   |
| 44  | 34,670,276     | 34,882,053     | 0.61   | 34,386,600     | 0.82   |
| 45  | 36,703,076     | 36,436,589     | 0.73   | 38,010,300     | 3.56   |
| 46  | 38,780,964     | 38,755,184     | 0.07   | 39,937,800     | 2.98   |
| 47  | 40,945,757     | 40,472,483     | 1.16   | 40,708,800     | 0.58   |
| 48  | 43,126,601     | 43,795,024     | 1.55   | 42,597,750     | 1.23   |
| 49  | 45,302,861     | 45,340,910     | 0.08   | 46,915,350     | 3.56   |
| 50  | 47,501,101     | 47,866,690     | 0.77   | 49,806,600     | 4.85   |
| 51  | 49,620,568     | 49,664,717     | 0.09   | 47,223,750     | 4.83   |
| 52  | 51,658,523     | 51,501,630     | 0.30   | 52,890,600     | 2.39   |
| 53  | 53,607,218     | 53,605,008     | 0.00   | 55,087,950     | 2.76   |
| 54  | 55,498,575     | 55,934,352     | 0.79   | 54,933,750     | 1.02   |
| 55  | 57,237,515     | 57,218,316     | 0.03   | 56,552,850     | 1.20   |
| 56  | 58,763,529     | 58,715,871     | 0.08   | 56,784,150     | 3.37   |
| 57  | 60,091,994     | 59,777,359     | 0.52   | 60,831,900     | 1.23   |
| 58  | 61,252,888     | 61,345,356     | 0.15   | 61,872,750     | 1.01   |
| 59  | 62,163,354     | 61,928,962     | 0.38   | 63,453,300     | 2.08   |
| 60  | 62,820,706     | 62,744,747     | 0.12   | 62,952,150     | 0.21   |
| 61  | 63,233,386     | 63,176,714     | 0.09   | 61,448,700     | 2.82   |
| 62  | 63,351,164     | 62,998,453     | 0.56   | 63,993,000     | 1.01   |
| 63  | 63,257,370     | 63,300,660     | 0.07   | 61,487,250     | 2.80   |
|     |                | AVG            | 0.69   | AVG            | 3.50   |
|     |                | MAX            | 2.32   | MAX            | 17.91  |
|     |                | STDEV          | 0.68   | STDEV          | 3.36   |

**Supp. Table 9.** The  $k$ -mer frequencies of DSK, ntCard, and KmerGenie for  $k=64$  for NA19238.

| $f$ | DSK            | ntCard         | Error% | KmerGenie      | Error% |
|-----|----------------|----------------|--------|----------------|--------|
| 1   | 19,074,667,480 | 19,078,850,494 | 0.02   | 19,217,432,098 | 0.75   |
| 2   | 342,561,366    | 342,437,615    | 0.04   | 351,669,549    | 2.66   |
| 3   | 64,952,380     | 64,784,528     | 0.26   | 66,739,131     | 2.75   |
| 4   | 27,321,610     | 27,557,094     | 0.86   | 26,617,078     | 2.58   |
| 5   | 15,891,476     | 16,102,311     | 1.33   | 16,451,515     | 3.52   |
| 6   | 11,319,361     | 11,286,869     | 0.29   | 10,656,653     | 5.85   |
| 7   | 9,305,101      | 9,117,019      | 2.02   | 8,790,511      | 5.53   |
| 8   | 8,510,212      | 8,397,315      | 1.33   | 8,201,203      | 3.63   |
| 9   | 8,416,781      | 8,107,858      | 3.67   | 7,955,658      | 5.48   |
| 10  | 8,809,969      | 9,115,518      | 3.47   | 8,741,402      | 0.78   |
| 11  | 9,584,737      | 9,488,282      | 1.01   | 9,723,582      | 1.45   |
| 12  | 10,708,661     | 10,848,282     | 1.30   | 10,361,999     | 3.24   |
| 13  | 12,101,678     | 12,004,761     | 0.80   | 13,062,994     | 7.94   |
| 14  | 13,746,102     | 13,658,048     | 0.64   | 13,013,885     | 5.33   |
| 15  | 15,601,843     | 15,898,677     | 1.90   | 15,813,098     | 1.35   |
| 16  | 17,630,231     | 17,700,620     | 0.40   | 18,072,112     | 2.51   |
| 17  | 19,748,954     | 19,543,540     | 1.04   | 19,005,183     | 3.77   |
| 18  | 21,896,697     | 22,113,776     | 0.99   | 23,523,211     | 7.43   |
| 19  | 24,048,896     | 24,222,050     | 0.72   | 24,603,609     | 2.31   |
| 20  | 26,149,656     | 25,835,371     | 1.20   | 26,469,751     | 1.22   |
| 21  | 28,133,218     | 28,274,756     | 0.50   | 29,514,509     | 4.91   |
| 22  | 29,991,329     | 29,897,535     | 0.31   | 31,085,997     | 3.65   |
| 23  | 31,662,621     | 31,565,061     | 0.31   | 30,447,580     | 3.84   |
| 24  | 33,134,302     | 33,196,630     | 0.19   | 32,706,594     | 1.29   |
| 25  | 34,484,948     | 34,324,225     | 0.47   | 35,653,134     | 3.39   |
| 26  | 35,683,829     | 35,865,975     | 0.51   | 35,211,153     | 1.32   |
| 27  | 36,708,886     | 36,479,197     | 0.63   | 35,554,916     | 3.14   |
| 28  | 37,712,821     | 37,917,686     | 0.54   | 36,340,660     | 3.64   |
| 29  | 38,667,537     | 38,349,917     | 0.82   | 39,385,418     | 1.86   |
| 30  | 39,622,538     | 39,921,286     | 0.75   | 40,122,053     | 1.26   |
| 31  | 40,681,340     | 40,469,864     | 0.52   | 40,220,271     | 1.13   |
| 32  | 41,815,839     | 42,064,382     | 0.59   | 40,956,906     | 2.05   |
| 33  | 43,162,870     | 42,982,999     | 0.42   | 44,247,209     | 2.51   |
| 34  | 44,672,088     | 44,580,734     | 0.20   | 44,296,318     | 0.84   |
| 35  | 46,312,643     | 46,521,714     | 0.45   | 46,506,223     | 0.42   |
| 36  | 48,193,234     | 47,930,629     | 0.54   | 45,131,171     | 6.35   |
| 37  | 50,287,987     | 50,339,566     | 0.10   | 53,332,374     | 6.05   |
| 38  | 52,548,661     | 52,451,177     | 0.19   | 51,220,687     | 2.53   |
| 39  | 54,941,358     | 55,203,790     | 0.48   | 59,176,345     | 7.71   |
| 40  | 57,366,017     | 57,323,028     | 0.07   | 61,484,468     | 7.18   |
| 41  | 59,821,745     | 59,856,382     | 0.06   | 59,470,999     | 0.59   |
| 42  | 62,277,598     | 61,915,307     | 0.58   | 62,908,629     | 1.01   |
| 43  | 64,664,115     | 64,373,108     | 0.45   | 68,457,946     | 5.87   |
| 44  | 66,957,853     | 66,616,430     | 0.51   | 70,569,633     | 5.39   |
| 45  | 69,053,986     | 69,225,031     | 0.25   | 71,355,377     | 3.33   |
| 46  | 70,927,509     | 71,267,199     | 0.48   | 68,163,292     | 3.90   |
| 47  | 72,532,991     | 72,512,334     | 0.03   | 71,257,159     | 1.76   |
| 48  | 73,832,022     | 73,836,744     | 0.01   | 71,699,140     | 2.89   |
| 49  | 74,723,642     | 74,730,511     | 0.01   | 75,038,552     | 0.42   |
| 50  | 75,273,548     | 74,965,966     | 0.41   | 78,967,272     | 4.91   |
| 51  | 75,412,773     | 75,435,276     | 0.03   | 79,703,907     | 5.69   |
| 52  | 75,196,502     | 75,215,547     | 0.03   | 76,904,694     | 2.27   |
| 53  | 74,501,383     | 74,446,137     | 0.07   | 74,056,372     | 0.60   |
| 54  | 73,426,681     | 73,035,826     | 0.53   | 74,105,481     | 0.92   |
| 55  | 71,936,960     | 71,867,550     | 0.10   | 71,748,249     | 0.26   |
| 56  | 70,033,372     | 69,749,760     | 0.40   | 70,422,306     | 0.56   |
| 57  | 67,744,755     | 68,170,403     | 0.63   | 67,132,003     | 0.90   |
| 58  | 65,127,802     | 64,932,460     | 0.30   | 66,591,804     | 2.25   |
| 59  | 62,253,568     | 61,611,400     | 1.03   | 62,024,667     | 0.37   |
| 60  | 59,102,284     | 59,479,334     | 0.64   | 58,979,909     | 0.21   |
| 61  | 55,694,408     | 55,633,440     | 0.11   | 54,560,099     | 2.04   |
| 62  | 52,137,686     | 52,441,944     | 0.58   | 52,104,649     | 0.06   |
| 63  | 48,488,414     | 48,672,104     | 0.38   | 60,660,444     | 25.10  |
|     |                | AVG            | 0.63   | AVG            | 3.28   |
|     |                | MAX            | 3.67   | MAX            | 25.10  |
|     |                | STDEV          | 0.68   | STDEV          | 3.48   |

**Supp. Table 10.** The  $k$ -mer frequencies of DSK, ntCard, and KmerGenie for  $k=96$  for NA19238.

| $f$ | DSK            | ntCard         | Error% | KmerGenie      | Error% |
|-----|----------------|----------------|--------|----------------|--------|
| 1   | 19,420,503,674 | 19,376,931,559 | 0.22   | 19,548,508,320 | 0.66   |
| 2   | 282,308,899    | 291,190,700    | 3.15   | 283,863,150    | 0.55   |
| 3   | 54,459,477     | 55,909,399     | 2.66   | 56,103,930     | 3.02   |
| 4   | 25,663,077     | 26,128,584     | 1.81   | 26,647,695     | 3.84   |
| 5   | 17,553,513     | 17,430,907     | 0.70   | 17,586,810     | 0.19   |
| 6   | 14,990,090     | 15,102,395     | 0.75   | 16,182,540     | 7.95   |
| 7   | 14,742,442     | 14,722,612     | 0.13   | 13,507,740     | 8.38   |
| 8   | 15,778,761     | 15,879,006     | 0.64   | 17,519,940     | 11.03  |
| 9   | 17,739,166     | 17,859,196     | 0.68   | 18,288,945     | 3.10   |
| 10  | 20,382,977     | 20,331,193     | 0.25   | 21,130,920     | 3.67   |
| 11  | 23,601,055     | 23,269,814     | 1.40   | 22,602,060     | 4.23   |
| 12  | 27,227,221     | 27,052,211     | 0.64   | 29,088,450     | 6.84   |
| 13  | 31,098,848     | 30,740,455     | 1.15   | 31,997,295     | 2.89   |
| 14  | 35,104,518     | 34,852,985     | 0.72   | 33,903,090     | 3.42   |
| 15  | 39,077,407     | 38,927,151     | 0.38   | 39,453,300     | 0.96   |
| 16  | 42,812,263     | 42,877,707     | 0.15   | 43,833,285     | 2.38   |
| 17  | 46,194,642     | 46,051,650     | 0.31   | 48,112,965     | 4.15   |
| 18  | 49,170,008     | 49,294,875     | 0.25   | 49,450,365     | 0.57   |
| 19  | 51,617,530     | 51,453,440     | 0.32   | 51,356,160     | 0.51   |
| 20  | 53,663,081     | 53,984,578     | 0.60   | 51,924,555     | 3.24   |
| 21  | 55,162,191     | 55,270,987     | 0.20   | 55,000,575     | 0.29   |
| 22  | 56,355,953     | 56,166,599     | 0.34   | 56,939,805     | 1.04   |
| 23  | 57,198,414     | 57,213,778     | 0.03   | 57,909,420     | 1.24   |
| 24  | 57,888,908     | 57,878,576     | 0.02   | 58,176,900     | 0.50   |
| 25  | 58,565,438     | 58,763,699     | 0.34   | 57,842,550     | 1.23   |
| 26  | 59,320,768     | 59,222,567     | 0.17   | 61,052,310     | 2.92   |
| 27  | 60,307,479     | 60,562,454     | 0.42   | 62,389,710     | 3.45   |
| 28  | 61,550,317     | 61,492,156     | 0.09   | 64,362,375     | 4.57   |
| 29  | 63,115,317     | 63,603,518     | 0.77   | 63,091,845     | 0.04   |
| 30  | 64,990,105     | 65,308,525     | 0.49   | 63,392,760     | 2.46   |
| 31  | 67,182,412     | 67,073,165     | 0.16   | 68,173,965     | 1.48   |
| 32  | 69,640,028     | 69,746,797     | 0.15   | 69,645,105     | 0.01   |
| 33  | 72,173,961     | 72,020,151     | 0.21   | 73,623,870     | 2.01   |
| 34  | 74,785,732     | 74,820,919     | 0.05   | 74,493,180     | 0.39   |
| 35  | 77,347,867     | 77,774,237     | 0.55   | 74,894,400     | 3.17   |
| 36  | 79,798,427     | 80,303,750     | 0.63   | 80,244,000     | 0.56   |
| 37  | 81,960,814     | 81,494,039     | 0.57   | 80,578,350     | 1.69   |
| 38  | 83,816,640     | 83,663,541     | 0.18   | 84,724,290     | 1.08   |
| 39  | 85,204,462     | 85,033,474     | 0.20   | 84,690,855     | 0.60   |
| 40  | 86,047,935     | 85,996,012     | 0.06   | 83,654,370     | 2.78   |
| 41  | 86,339,203     | 85,238,744     | 1.27   | 85,426,425     | 1.06   |
| 42  | 86,031,814     | 85,638,593     | 0.46   | 85,092,075     | 1.09   |
| 43  | 85,099,410     | 84,665,749     | 0.51   | 87,298,785     | 2.58   |
| 44  | 83,515,753     | 83,305,372     | 0.25   | 83,219,715     | 0.35   |
| 45  | 81,290,333     | 80,944,079     | 0.43   | 82,818,495     | 1.88   |
| 46  | 78,503,679     | 77,483,432     | 1.30   | 78,839,730     | 0.43   |
| 47  | 75,206,358     | 75,964,425     | 1.01   | 75,997,755     | 1.05   |
| 48  | 71,445,945     | 71,190,631     | 0.36   | 72,620,820     | 1.64   |
| 49  | 67,291,563     | 67,802,918     | 0.76   | 68,140,530     | 1.26   |
| 50  | 62,832,014     | 62,415,670     | 0.66   | 64,429,245     | 2.54   |
| 51  | 58,124,406     | 58,046,686     | 0.13   | 59,179,950     | 1.82   |
| 52  | 53,348,421     | 53,208,749     | 0.26   | 53,228,520     | 0.22   |
| 53  | 48,497,096     | 48,317,970     | 0.37   | 48,948,840     | 0.93   |
| 54  | 43,727,781     | 43,407,060     | 0.73   | 45,939,690     | 5.06   |
| 55  | 39,060,481     | 39,309,639     | 0.64   | 38,483,685     | 1.48   |
| 56  | 34,583,992     | 34,312,154     | 0.79   | 34,538,355     | 0.13   |
| 57  | 30,333,946     | 30,080,851     | 0.83   | 30,559,590     | 0.74   |
| 58  | 26,381,945     | 26,188,955     | 0.73   | 26,547,390     | 0.63   |
| 59  | 22,735,166     | 22,939,750     | 0.90   | 23,304,195     | 2.50   |
| 60  | 19,446,835     | 19,428,103     | 0.10   | 19,225,125     | 1.14   |
| 61  | 16,490,743     | 16,617,782     | 0.77   | 15,580,710     | 5.52   |
| 62  | 13,879,203     | 14,013,435     | 0.97   | 14,143,005     | 1.90   |
| 63  | 11,597,600     | 11,512,240     | 0.74   | 11,468,205     | 1.12   |
|     |                | AVG            | 0.60   | AVG            | 2.23   |
|     |                | MAX            | 3.15   | MAX            | 11.03  |
|     |                | STDEV          | 0.56   | STDEV          | 2.15   |

**Supp. Table 11.** The  $k$ -mer frequencies of DSK, ntCard, and KmerGenie for  $k=128$  for NA19238.

| $f$ | DSK            | ntCard         | Error% | KmerGenie      | Error% |
|-----|----------------|----------------|--------|----------------|--------|
| 1   | 17,902,027,438 | 17,864,030,547 | 0.21   | 18,053,843,452 | 0.85   |
| 2   | 219,074,213    | 229,655,845    | 4.83   | 222,218,225    | 1.44   |
| 3   | 47,660,610     | 48,455,773     | 1.67   | 48,372,365     | 1.49   |
| 4   | 28,458,423     | 28,502,475     | 0.15   | 27,746,585     | 2.50   |
| 5   | 25,220,664     | 25,322,354     | 0.40   | 25,389,353     | 0.67   |
| 6   | 26,863,655     | 26,728,874     | 0.50   | 26,567,969     | 1.10   |
| 7   | 30,937,124     | 30,813,466     | 0.40   | 31,380,651     | 1.43   |
| 8   | 36,537,328     | 35,997,413     | 1.48   | 37,028,186     | 1.34   |
| 9   | 43,058,213     | 42,939,508     | 0.28   | 39,778,290     | 7.62   |
| 10  | 50,073,961     | 49,855,415     | 0.44   | 49,796,526     | 0.55   |
| 11  | 57,131,512     | 56,978,579     | 0.27   | 57,506,639     | 0.66   |
| 12  | 63,762,620     | 63,020,538     | 1.16   | 65,756,951     | 3.13   |
| 13  | 69,682,587     | 69,293,844     | 0.56   | 72,877,756     | 4.59   |
| 14  | 74,487,927     | 73,953,747     | 0.72   | 73,368,846     | 1.50   |
| 15  | 78,198,344     | 78,149,055     | 0.06   | 78,623,509     | 0.54   |
| 16  | 80,694,462     | 80,513,285     | 0.22   | 79,311,035     | 1.71   |
| 17  | 82,295,487     | 81,950,855     | 0.42   | 82,306,684     | 0.01   |
| 18  | 83,084,771     | 82,998,538     | 0.10   | 83,141,537     | 0.07   |
| 19  | 83,483,643     | 83,419,414     | 0.08   | 84,663,916     | 1.41   |
| 20  | 83,711,270     | 83,910,734     | 0.24   | 86,038,968     | 2.78   |
| 21  | 84,183,095     | 84,186,381     | 0.00   | 86,726,494     | 3.02   |
| 22  | 84,964,856     | 84,760,063     | 0.24   | 82,110,248     | 3.36   |
| 23  | 86,212,498     | 85,643,986     | 0.66   | 82,601,338     | 4.19   |
| 24  | 87,917,383     | 87,946,740     | 0.03   | 88,838,181     | 1.05   |
| 25  | 90,072,760     | 89,908,577     | 0.18   | 89,673,034     | 0.44   |
| 26  | 92,482,062     | 93,188,780     | 0.76   | 93,847,299     | 1.48   |
| 27  | 94,989,315     | 94,740,939     | 0.26   | 98,267,109     | 3.45   |
| 28  | 97,336,756     | 97,046,640     | 0.30   | 97,776,019     | 0.45   |
| 29  | 99,316,688     | 99,806,932     | 0.49   | 101,753,848    | 2.45   |
| 30  | 100,800,801    | 100,951,466    | 0.15   | 98,807,308     | 1.98   |
| 31  | 101,544,014    | 101,893,260    | 0.34   | 103,374,445    | 1.80   |
| 32  | 101,409,315    | 101,377,162    | 0.03   | 104,503,952    | 3.05   |
| 33  | 100,296,926    | 100,427,207    | 0.13   | 97,874,237     | 2.42   |
| 34  | 98,218,038     | 97,780,653     | 0.45   | 98,168,891     | 0.05   |
| 35  | 95,144,483     | 95,570,049     | 0.45   | 98,168,891     | 3.18   |
| 36  | 91,166,502     | 91,334,818     | 0.18   | 92,914,228     | 1.92   |
| 37  | 86,333,852     | 85,829,007     | 0.58   | 82,552,229     | 4.38   |
| 38  | 80,829,400     | 80,991,602     | 0.20   | 80,882,523     | 0.07   |
| 39  | 74,772,191     | 75,069,482     | 0.40   | 73,025,083     | 2.34   |
| 40  | 68,423,734     | 68,251,774     | 0.25   | 66,788,240     | 2.39   |
| 41  | 61,852,988     | 61,735,090     | 0.19   | 60,944,269     | 1.47   |
| 42  | 55,231,615     | 55,117,117     | 0.21   | 52,301,085     | 5.31   |
| 43  | 48,743,059     | 49,094,195     | 0.72   | 49,550,981     | 1.66   |
| 44  | 42,506,944     | 42,885,336     | 0.89   | 42,331,958     | 0.41   |
| 45  | 36,640,880     | 37,171,884     | 1.45   | 38,403,238     | 4.81   |
| 46  | 31,237,420     | 31,265,133     | 0.09   | 31,675,305     | 1.40   |
| 47  | 26,342,228     | 25,882,762     | 1.74   | 23,916,083     | 9.21   |
| 48  | 21,952,651     | 21,897,792     | 0.25   | 22,197,268     | 1.11   |
| 49  | 18,109,906     | 18,185,237     | 0.42   | 18,464,984     | 1.96   |
| 50  | 14,800,251     | 14,803,151     | 0.02   | 15,371,117     | 3.86   |
| 51  | 11,974,386     | 11,721,069     | 2.12   | 13,161,212     | 9.91   |
| 52  | 9,605,152      | 9,708,904      | 1.08   | 10,018,236     | 4.30   |
| 53  | 7,671,941      | 7,777,948      | 1.38   | 8,446,748      | 10.10  |
| 54  | 6,083,920      | 6,342,034      | 4.24   | 5,893,080      | 3.14   |
| 55  | 4,805,106      | 4,745,168      | 1.25   | 4,960,009      | 3.22   |
| 56  | 3,793,983      | 3,876,638      | 2.18   | 4,272,483      | 12.61  |
| 57  | 3,000,182      | 3,041,987      | 1.39   | 2,848,322      | 5.06   |
| 58  | 2,385,750      | 2,361,159      | 1.03   | 2,553,668      | 7.04   |
| 59  | 1,919,068      | 1,847,451      | 3.73   | 1,767,924      | 7.88   |
| 60  | 1,561,783      | 1,621,498      | 3.82   | 2,013,469      | 28.92  |
| 61  | 1,293,425      | 1,241,348      | 4.03   | 1,129,507      | 12.67  |
| 62  | 1,093,205      | 1,102,878      | 0.88   | 1,178,616      | 7.81   |
| 63  | 946,854        | 987,759        | 4.32   | 1,375,052      | 45.22  |
|     |                | AVG            | 0.92   | AVG            | 4.25   |
|     |                | MAX            | 4.83   | MAX            | 45.22  |
|     |                | STDEV          | 1.18   | STDEV          | 6.80   |

**Supp. Table 12.** The  $k$ -mer frequencies of DSK, ntCard, and KmerGenie for  $k=32$  for PG29.

| $f$ | DSK            | ntCard         | Error% | KmerGenie      | Error% |
|-----|----------------|----------------|--------|----------------|--------|
| 1   | 27,430,910,949 | 27,426,448,310 | 0.02   | 31,637,221,856 | 15.33  |
| 2   | 1,387,809,246  | 1,389,451,001  | 0.12   | 1,691,533,120  | 21.89  |
| 3   | 350,390,148    | 349,714,416    | 0.19   | 425,758,688    | 21.51  |
| 4   | 171,711,802    | 172,892,861    | 0.69   | 203,856,512    | 18.72  |
| 5   | 116,050,402    | 116,055,438    | 0.00   | 133,656,896    | 15.17  |
| 6   | 99,156,313     | 99,268,914     | 0.11   | 109,067,200    | 10.00  |
| 7   | 99,121,826     | 98,670,654     | 0.46   | 99,746,912     | 0.63   |
| 8   | 109,752,818    | 109,416,541    | 0.31   | 104,307,904    | 4.96   |
| 9   | 128,437,274    | 128,480,787    | 0.03   | 144,365,312    | 12.40  |
| 10  | 154,072,012    | 153,474,253    | 0.39   | 161,022,848    | 4.51   |
| 11  | 185,369,757    | 185,748,995    | 0.20   | 181,249,856    | 2.22   |
| 12  | 221,102,222    | 220,672,412    | 0.19   | 228,247,904    | 3.23   |
| 13  | 259,377,565    | 259,868,740    | 0.19   | 258,191,808    | 0.46   |
| 14  | 298,066,994    | 299,110,382    | 0.35   | 297,059,392    | 0.34   |
| 15  | 335,024,898    | 336,029,735    | 0.30   | 336,720,192    | 0.51   |
| 16  | 368,147,603    | 366,904,043    | 0.34   | 377,570,816    | 2.56   |
| 17  | 395,765,430    | 395,084,465    | 0.17   | 406,523,200    | 2.72   |
| 18  | 416,598,835    | 416,666,618    | 0.02   | 415,645,184    | 0.23   |
| 19  | 429,772,109    | 430,464,573    | 0.16   | 418,223,136    | 2.69   |
| 20  | 435,392,488    | 435,566,519    | 0.04   | 421,990,912    | 3.08   |
| 21  | 433,825,841    | 433,488,148    | 0.08   | 422,189,216    | 2.68   |
| 22  | 425,873,062    | 425,590,688    | 0.07   | 416,438,400    | 2.22   |
| 23  | 412,724,311    | 412,131,175    | 0.14   | 410,290,976    | 0.59   |
| 24  | 395,426,021    | 395,825,922    | 0.10   | 386,494,496    | 2.26   |
| 25  | 375,336,933    | 374,103,194    | 0.33   | 385,701,280    | 2.76   |
| 26  | 353,602,476    | 354,641,223    | 0.29   | 359,525,152    | 1.67   |
| 27  | 331,198,158    | 331,619,395    | 0.13   | 346,437,088    | 4.60   |
| 28  | 309,025,096    | 309,165,243    | 0.05   | 313,716,928    | 1.52   |
| 29  | 287,724,851    | 289,309,919    | 0.55   | 286,747,584    | 0.34   |
| 30  | 267,671,913    | 266,967,790    | 0.26   | 265,727,360    | 0.73   |
| 31  | 249,191,152    | 249,083,627    | 0.04   | 268,305,312    | 7.67   |
| 32  | 232,311,547    | 231,847,348    | 0.20   | 229,041,120    | 1.41   |
| 33  | 217,260,210    | 218,177,312    | 0.42   | 223,290,304    | 2.78   |
| 34  | 203,859,537    | 202,776,544    | 0.53   | 209,409,024    | 2.72   |
| 35  | 192,020,454    | 192,590,567    | 0.30   | 186,009,152    | 3.13   |
| 36  | 181,556,134    | 180,358,602    | 0.66   | 193,346,400    | 6.49   |
| 37  | 172,225,210    | 172,692,530    | 0.27   | 173,714,304    | 0.86   |
| 38  | 163,885,099    | 163,233,828    | 0.40   | 161,617,760    | 1.38   |
| 39  | 156,398,560    | 157,010,116    | 0.39   | 150,909,344    | 3.51   |
| 40  | 149,589,130    | 149,331,444    | 0.17   | 138,614,496    | 7.34   |
| 41  | 143,302,761    | 144,161,261    | 0.60   | 140,795,840    | 1.75   |
| 42  | 137,445,696    | 137,216,320    | 0.17   | 132,467,072    | 3.62   |
| 43  | 131,887,301    | 132,254,754    | 0.28   | 131,872,160    | 0.01   |
| 44  | 126,598,354    | 127,215,314    | 0.49   | 124,336,608    | 1.79   |
| 45  | 121,458,616    | 120,810,803    | 0.53   | 117,792,576    | 3.02   |
| 46  | 116,516,109    | 116,190,475    | 0.28   | 112,041,760    | 3.84   |
| 47  | 111,646,342    | 111,992,636    | 0.31   | 110,455,328    | 1.07   |
| 48  | 106,943,071    | 107,136,764    | 0.18   | 111,645,152    | 4.40   |
| 49  | 102,288,148    | 101,821,828    | 0.46   | 107,084,160    | 4.69   |
| 50  | 97,773,975     | 97,541,728     | 0.24   | 99,746,912     | 2.02   |
| 51  | 93,349,409     | 94,018,838     | 0.72   | 96,970,656     | 3.88   |
| 52  | 89,052,632     | 89,072,634     | 0.02   | 92,211,360     | 3.55   |
| 53  | 84,864,906     | 84,409,044     | 0.54   | 81,899,552     | 3.49   |
| 54  | 80,830,407     | 81,257,866     | 0.53   | 79,916,512     | 1.13   |
| 55  | 76,945,977     | 76,993,685     | 0.06   | 79,321,600     | 3.09   |
| 56  | 73,165,096     | 73,054,356     | 0.15   | 74,165,696     | 1.37   |
| 57  | 69,534,960     | 69,693,107     | 0.23   | 70,397,920     | 1.24   |
| 58  | 66,048,290     | 65,619,336     | 0.65   | 66,630,144     | 0.88   |
| 59  | 62,727,490     | 62,433,288     | 0.47   | 63,655,584     | 1.48   |
| 60  | 59,582,910     | 59,270,336     | 0.52   | 62,267,456     | 4.51   |
| 61  | 56,576,498     | 56,264,043     | 0.55   | 51,360,736     | 9.22   |
| 62  | 53,711,573     | 53,694,153     | 0.03   | 59,292,896     | 10.39  |
| 63  | 51,013,336     | 50,971,744     | 0.08   | 52,352,256     | 2.62   |
|     |                | AVG            | 0.28   | AVG            | 4.33   |
|     |                | MAX            | 0.72   | MAX            | 21.89  |
|     |                | STDEV          | 0.20   | STDEV          | 4.94   |

**Supp. Table 13.** The  $k$ -mer frequencies of DSK, ntCard, and KmerGenie for  $k=64$  for PG29.

| $f$ | DSK            | ntCard         | Error% | KmerGenie      | Error% |
|-----|----------------|----------------|--------|----------------|--------|
| 1   | 44,344,130,473 | 44,359,962,143 | 0.04   | 51,598,993,212 | 16.36  |
| 2   | 1,058,391,480  | 1,059,215,469  | 0.08   | 1,318,128,552  | 24.54  |
| 3   | 304,744,499    | 305,269,528    | 0.17   | 345,475,468    | 13.37  |
| 4   | 244,043,506    | 243,275,577    | 0.31   | 256,412,728    | 5.07   |
| 5   | 279,144,707    | 278,882,007    | 0.09   | 277,084,080    | 0.74   |
| 6   | 358,411,249    | 357,254,650    | 0.32   | 358,889,856    | 0.13   |
| 7   | 467,102,251    | 466,994,232    | 0.02   | 461,806,800    | 1.13   |
| 8   | 594,972,530    | 595,825,563    | 0.14   | 602,547,920    | 1.27   |
| 9   | 731,168,050    | 731,483,154    | 0.04   | 734,052,904    | 0.39   |
| 10  | 863,467,638    | 861,152,709    | 0.27   | 879,412,092    | 1.85   |
| 11  | 979,792,323    | 980,174,265    | 0.04   | 963,416,948    | 1.67   |
| 12  | 1,070,499,982  | 1,069,177,489  | 0.12   | 1,056,657,940  | 1.29   |
| 13  | 1,129,311,769  | 1,131,498,917  | 0.19   | 1,090,303,864  | 3.45   |
| 14  | 1,154,118,918  | 1,152,400,543  | 0.15   | 1,169,690,652  | 1.35   |
| 15  | 1,146,170,367  | 1,149,679,014  | 0.31   | 1,129,887,304  | 1.42   |
| 16  | 1,110,043,613  | 1,108,539,690  | 0.14   | 1,109,435,860  | 0.05   |
| 17  | 1,052,102,837  | 1,050,046,277  | 0.20   | 1,056,657,940  | 0.43   |
| 18  | 979,048,432    | 981,172,640    | 0.22   | 989,366,092    | 1.05   |
| 19  | 897,755,694    | 898,502,443    | 0.08   | 900,083,444    | 0.26   |
| 20  | 813,492,817    | 812,910,416    | 0.07   | 825,314,724    | 1.45   |
| 21  | 730,817,879    | 729,793,025    | 0.14   | 760,881,680    | 4.11   |
| 22  | 652,942,858    | 654,078,166    | 0.17   | 656,645,288    | 0.57   |
| 23  | 581,744,571    | 579,790,909    | 0.34   | 586,934,452    | 0.89   |
| 24  | 518,095,968    | 520,436,044    | 0.45   | 531,077,820    | 2.51   |
| 25  | 462,093,895    | 463,019,944    | 0.20   | 462,026,708    | 0.01   |
| 26  | 413,349,280    | 412,625,104    | 0.18   | 405,730,260    | 1.84   |
| 27  | 371,308,278    | 370,447,365    | 0.23   | 363,507,924    | 2.10   |
| 28  | 335,032,329    | 333,163,314    | 0.56   | 334,260,160    | 0.23   |
| 29  | 303,713,035    | 304,182,109    | 0.15   | 298,195,248    | 1.82   |
| 30  | 276,411,534    | 277,568,559    | 0.42   | 275,324,816    | 0.39   |
| 31  | 252,455,179    | 252,284,108    | 0.07   | 253,334,016    | 0.35   |
| 32  | 231,301,044    | 231,137,592    | 0.07   | 229,364,044    | 0.84   |
| 33  | 212,443,283    | 212,770,554    | 0.15   | 209,352,416    | 1.45   |
| 34  | 195,397,396    | 195,423,098    | 0.01   | 195,718,120    | 0.16   |
| 35  | 179,984,187    | 180,556,034    | 0.32   | 180,544,468    | 0.31   |
| 36  | 165,807,712    | 165,032,329    | 0.47   | 164,051,368    | 1.06   |
| 37  | 152,801,139    | 154,270,841    | 0.96   | 140,741,120    | 7.89   |
| 38  | 140,846,302    | 141,185,846    | 0.24   | 135,683,236    | 3.67   |
| 39  | 129,791,135    | 130,072,366    | 0.22   | 130,405,444    | 0.47   |
| 40  | 119,560,159    | 118,311,098    | 1.04   | 118,310,504    | 1.05   |
| 41  | 110,088,923    | 109,755,676    | 0.30   | 116,771,148    | 6.07   |
| 42  | 101,331,018    | 101,083,938    | 0.24   | 104,236,392    | 2.87   |
| 43  | 93,277,261     | 93,519,313     | 0.26   | 89,282,648     | 4.28   |
| 44  | 85,862,377     | 85,909,347     | 0.05   | 85,764,120     | 0.11   |
| 45  | 79,038,067     | 79,188,297     | 0.19   | 81,146,052     | 2.67   |
| 46  | 72,730,819     | 73,381,235     | 0.89   | 71,250,192     | 2.04   |
| 47  | 66,958,741     | 66,557,274     | 0.60   | 73,449,272     | 9.69   |
| 48  | 61,660,909     | 61,282,475     | 0.61   | 57,176,080     | 7.27   |
| 49  | 56,830,113     | 57,068,662     | 0.42   | 56,736,264     | 0.17   |
| 50  | 52,402,360     | 51,842,900     | 1.07   | 55,196,908     | 5.33   |
| 51  | 48,369,898     | 48,361,867     | 0.02   | 47,280,220     | 2.25   |
| 52  | 44,688,457     | 45,663,423     | 2.18   | 44,421,416     | 0.60   |
| 53  | 41,309,395     | 40,354,352     | 2.31   | 46,180,680     | 11.79  |
| 54  | 38,249,355     | 38,130,872     | 0.31   | 33,206,108     | 13.19  |
| 55  | 35,422,440     | 35,185,771     | 0.67   | 35,625,096     | 0.57   |
| 56  | 32,856,893     | 33,604,857     | 2.28   | 33,865,832     | 3.07   |
| 57  | 30,524,398     | 30,673,793     | 0.49   | 29,467,672     | 3.46   |
| 58  | 28,379,165     | 28,211,890     | 0.59   | 26,169,052     | 7.79   |
| 59  | 26,420,852     | 26,996,019     | 2.18   | 28,148,224     | 6.54   |
| 60  | 24,646,117     | 24,912,913     | 1.08   | 28,807,948     | 16.89  |
| 61  | 23,006,760     | 23,301,593     | 1.28   | 20,451,444     | 11.11  |
| 62  | 21,535,331     | 21,187,128     | 1.62   | 20,671,352     | 4.01   |
| 63  | 20,161,903     | 20,709,470     | 2.72   | 23,310,248     | 15.62  |
|     |                | AVG            | 0.50   | AVG            | 3.91   |
|     |                | MAX            | 2.72   | MAX            | 24.54  |
|     |                | STDEV          | 0.63   | STDEV          | 5.07   |

**Supp. Table 14.** The  $k$ -mer frequencies of DSK, ntCard, and KmerGenie for  $k=96$  for PG29.

| $f$ | DSK            | ntCard         | Error% | KmerGenie      | Error% |
|-----|----------------|----------------|--------|----------------|--------|
| 1   | 43,300,244,443 | 43,036,616,081 | 0.61   | 50,880,746,585 | 17.51  |
| 2   | 898,031,149    | 932,941,144    | 3.89   | 1,066,153,205  | 18.72  |
| 3   | 707,016,398    | 706,351,268    | 0.09   | 732,501,615    | 3.60   |
| 4   | 965,800,373    | 961,568,021    | 0.44   | 956,679,615    | 0.94   |
| 5   | 1,291,696,378  | 1,283,755,561  | 0.61   | 1,273,331,040  | 1.42   |
| 6   | 1,606,040,417  | 1,597,494,114  | 0.53   | 1,582,696,680  | 1.45   |
| 7   | 1,853,981,273  | 1,844,250,584  | 0.52   | 1,834,149,670  | 1.07   |
| 8   | 2,001,239,303  | 1,993,152,433  | 0.40   | 1,993,502,865  | 0.39   |
| 9   | 2,037,849,212  | 2,029,572,623  | 0.41   | 2,027,690,010  | 0.50   |
| 10  | 1,973,342,921  | 1,963,162,359  | 0.52   | 1,947,546,375  | 1.31   |
| 11  | 1,832,321,839  | 1,824,183,587  | 0.44   | 1,824,435,290  | 0.43   |
| 12  | 1,643,575,419  | 1,636,762,494  | 0.41   | 1,651,444,600  | 0.48   |
| 13  | 1,434,671,059  | 1,429,904,970  | 0.33   | 1,432,684,235  | 0.14   |
| 14  | 1,226,867,295  | 1,221,175,808  | 0.46   | 1,256,144,060  | 2.39   |
| 15  | 1,034,419,205  | 1,032,492,988  | 0.19   | 1,042,614,515  | 0.79   |
| 16  | 864,953,818    | 862,316,459    | 0.30   | 874,107,385    | 1.06   |
| 17  | 720,753,222    | 720,427,454    | 0.05   | 727,457,610    | 0.93   |
| 18  | 601,253,972    | 600,639,316    | 0.10   | 606,401,490    | 0.86   |
| 19  | 503,334,855    | 502,868,040    | 0.09   | 505,334,575    | 0.40   |
| 20  | 423,827,756    | 423,347,225    | 0.11   | 427,619,535    | 0.89   |
| 21  | 359,196,771    | 358,663,860    | 0.15   | 354,574,870    | 1.29   |
| 22  | 306,266,415    | 305,851,779    | 0.14   | 320,761,355    | 4.73   |
| 23  | 262,638,051    | 262,319,477    | 0.12   | 274,618,050    | 4.56   |
| 24  | 226,304,457    | 227,361,944    | 0.47   | 225,859,335    | 0.20   |
| 25  | 195,644,114    | 195,681,121    | 0.02   | 196,342,565    | 0.36   |
| 26  | 169,676,672    | 169,231,732    | 0.26   | 170,188,465    | 0.30   |
| 27  | 147,420,488    | 146,262,619    | 0.79   | 155,056,450    | 5.18   |
| 28  | 128,282,598    | 129,012,537    | 0.57   | 130,396,870    | 1.65   |
| 29  | 111,768,049    | 111,630,842    | 0.12   | 112,836,260    | 0.96   |
| 30  | 97,496,043     | 97,720,828     | 0.23   | 101,814,175    | 4.43   |
| 31  | 85,133,870     | 85,044,445     | 0.11   | 86,495,345     | 1.60   |
| 32  | 74,443,436     | 75,299,775     | 1.15   | 76,220,520     | 2.39   |
| 33  | 65,183,093     | 65,630,422     | 0.69   | 61,462,135     | 5.71   |
| 34  | 57,172,299     | 57,273,331     | 0.18   | 63,330,285     | 10.77  |
| 35  | 50,254,833     | 50,453,857     | 0.40   | 51,934,570     | 3.34   |
| 36  | 44,225,682     | 44,697,157     | 1.07   | 44,275,155     | 0.11   |
| 37  | 39,030,772     | 39,077,854     | 0.12   | 44,088,340     | 12.96  |
| 38  | 34,551,288     | 34,871,851     | 0.93   | 33,066,255     | 4.30   |
| 39  | 30,662,154     | 30,756,149     | 0.31   | 27,835,435     | 9.22   |
| 40  | 27,302,004     | 27,745,656     | 1.62   | 28,769,510     | 5.38   |
| 41  | 24,397,583     | 24,325,429     | 0.30   | 22,604,615     | 7.35   |
| 42  | 21,858,560     | 22,017,184     | 0.73   | 22,417,800     | 2.56   |
| 43  | 19,662,239     | 19,783,303     | 0.62   | 20,549,650     | 4.51   |
| 44  | 17,738,982     | 18,031,501     | 1.65   | 19,615,575     | 10.58  |
| 45  | 16,062,223     | 16,403,515     | 2.12   | 17,560,610     | 9.33   |
| 46  | 14,594,560     | 14,836,392     | 1.66   | 10,835,270     | 25.76  |
| 47  | 13,301,488     | 13,651,239     | 2.63   | 15,879,275     | 19.38  |
| 48  | 12,162,628     | 12,550,440     | 3.19   | 14,758,385     | 21.34  |
| 49  | 11,144,319     | 11,318,751     | 1.57   | 11,022,085     | 1.10   |
| 50  | 10,254,185     | 10,362,347     | 1.05   | 9,527,565      | 7.09   |
| 51  | 9,472,392      | 9,451,002      | 0.23   | 9,340,750      | 1.39   |
| 52  | 8,760,594      | 8,916,220      | 1.78   | 6,538,525      | 25.36  |
| 53  | 8,136,102      | 8,332,961      | 2.42   | 10,648,455     | 30.88  |
| 54  | 7,573,126      | 7,577,645      | 0.06   | 8,219,860      | 8.54   |
| 55  | 7,060,989      | 7,276,106      | 3.05   | 5,604,450      | 20.63  |
| 56  | 6,608,684      | 6,730,716      | 1.85   | 6,912,155      | 4.59   |
| 57  | 6,199,642      | 6,373,294      | 2.80   | 6,538,525      | 5.47   |
| 58  | 5,826,148      | 5,911,328      | 1.46   | 4,483,560      | 23.04  |
| 59  | 5,492,975      | 5,711,879      | 3.99   | 6,912,155      | 25.84  |
| 60  | 5,176,400      | 5,229,073      | 1.02   | 5,230,820      | 1.05   |
| 61  | 4,897,209      | 5,011,077      | 2.33   | 6,164,895      | 25.89  |
| 62  | 4,639,376      | 4,729,919      | 1.95   | 4,109,930      | 11.41  |
| 63  | 4,400,250      | 4,516,981      | 2.65   | 4,109,930      | 6.60   |
|     |                | AVG            | 0.97   | AVG            | 6.89   |
|     |                | MAX            | 3.99   | MAX            | 30.88  |
|     |                | STDEV          | 1.00   | STDEV          | 8.24   |

**Supp. Table 15.** The  $k$ -mer frequencies of DSK, ntCard, and KmerGenie for  $k=128$  for PG29.

| $f$ | DSK            | ntCard         | Error% | KmerGenie      | Error% |
|-----|----------------|----------------|--------|----------------|--------|
| 1   | 32,089,613,024 | 31,961,397,892 | 0.40   | 36,846,185,246 | 14.82  |
| 2   | 2,906,826,774  | 2,903,450,063  | 0.12   | 2,918,992,670  | 0.42   |
| 3   | 3,528,887,195  | 3,515,526,971  | 0.38   | 3,469,505,791  | 1.68   |
| 4   | 3,785,681,675  | 3,772,834,237  | 0.34   | 3,785,793,909  | 0.00   |
| 5   | 3,572,564,965  | 3,559,249,791  | 0.37   | 3,609,549,948  | 1.04   |
| 6   | 3,053,210,499  | 3,050,701,898  | 0.08   | 3,070,080,835  | 0.55   |
| 7   | 2,422,704,144  | 2,414,305,067  | 0.35   | 2,469,409,511  | 1.93   |
| 8   | 1,823,893,429  | 1,821,291,960  | 0.14   | 1,811,063,923  | 0.70   |
| 9   | 1,327,251,074  | 1,326,308,733  | 0.07   | 1,348,135,921  | 1.57   |
| 10  | 949,469,860    | 950,923,714    | 0.15   | 956,073,637    | 0.70   |
| 11  | 676,800,750    | 676,056,332    | 0.11   | 676,905,657    | 0.02   |
| 12  | 485,255,917    | 486,751,332    | 0.31   | 504,189,643    | 3.90   |
| 13  | 351,999,218    | 352,633,774    | 0.18   | 348,653,197    | 0.95   |
| 14  | 258,705,511    | 258,079,904    | 0.24   | 263,215,524    | 1.74   |
| 15  | 192,574,291    | 194,804,917    | 1.16   | 196,491,309    | 2.03   |
| 16  | 144,886,815    | 145,629,939    | 0.51   | 147,713,607    | 1.95   |
| 17  | 109,994,471    | 110,472,781    | 0.43   | 103,997,742    | 5.45   |
| 18  | 84,210,354     | 84,094,204     | 0.14   | 84,210,561     | 0.00   |
| 19  | 64,992,769     | 65,952,127     | 1.48   | 66,724,215     | 2.66   |
| 20  | 50,552,591     | 51,680,691     | 2.23   | 54,453,095     | 7.72   |
| 21  | 39,689,534     | 39,758,767     | 0.17   | 38,040,472     | 4.15   |
| 22  | 31,486,278     | 31,232,898     | 0.80   | 33,592,191     | 6.69   |
| 23  | 25,275,422     | 25,937,510     | 2.62   | 26,382,908     | 4.38   |
| 24  | 20,531,059     | 20,751,793     | 1.08   | 23,008,350     | 12.07  |
| 25  | 16,905,515     | 17,256,090     | 2.07   | 17,639,735     | 4.34   |
| 26  | 14,099,871     | 14,243,523     | 1.02   | 13,344,843     | 5.35   |
| 27  | 11,906,560     | 12,110,219     | 1.71   | 12,577,898     | 5.64   |
| 28  | 10,182,403     | 10,169,175     | 0.13   | 11,350,786     | 11.47  |
| 29  | 8,821,744      | 9,192,513      | 4.20   | 7,976,228      | 9.58   |
| 30  | 7,714,351      | 7,666,099      | 0.63   | 6,902,505      | 10.52  |
| 31  | 6,807,619      | 6,815,006      | 0.11   | 5,215,226      | 23.39  |
| 32  | 6,057,582      | 6,130,146      | 1.20   | 7,822,839      | 29.14  |
| 33  | 5,441,514      | 5,548,774      | 1.97   | 6,135,560      | 12.75  |
| 34  | 4,918,198      | 5,008,826      | 1.84   | 3,221,169      | 34.51  |
| 35  | 4,472,444      | 4,624,758      | 3.41   | 3,988,114      | 10.83  |
| 36  | 4,082,734      | 4,085,271      | 0.06   | 4,755,059      | 16.47  |
| 37  | 3,750,820      | 3,934,984      | 4.91   | 4,755,059      | 26.77  |
| 38  | 3,461,233      | 3,587,991      | 3.66   | 3,067,780      | 11.37  |
| 39  | 3,201,009      | 3,351,164      | 4.69   | 3,221,169      | 0.63   |
| 40  | 2,971,253      | 3,173,174      | 6.80   | 2,300,835      | 22.56  |
| 41  | 2,768,397      | 2,875,604      | 3.87   | 1,994,057      | 27.97  |
| 42  | 2,592,248      | 2,732,397      | 5.41   | 2,454,224      | 5.32   |
| 43  | 2,425,325      | 2,646,567      | 9.12   | 3,834,725      | 58.11  |
| 44  | 2,278,604      | 2,244,797      | 1.48   | 2,454,224      | 7.71   |
| 45  | 2,141,789      | 2,355,443      | 9.98   | 2,147,446      | 0.26   |
| 46  | 2,021,550      | 2,015,046      | 0.32   | 1,380,501      | 31.71  |
| 47  | 1,907,384      | 2,011,048      | 5.43   | 1,687,279      | 11.54  |
| 48  | 1,809,373      | 1,769,676      | 2.19   | 1,840,668      | 1.73   |
| 49  | 1,714,589      | 1,816,125      | 5.92   | 1,840,668      | 7.35   |
| 50  | 1,626,364      | 1,647,043      | 1.27   | 1,380,501      | 15.12  |
| 51  | 1,546,740      | 1,608,060      | 3.96   | 2,607,613      | 68.59  |
| 52  | 1,473,353      | 1,581,836      | 7.36   | 1,687,279      | 14.52  |
| 53  | 1,401,882      | 1,378,742      | 1.65   | 1,073,723      | 23.41  |
| 54  | 1,336,585      | 1,326,448      | 0.76   | 920,334        | 31.14  |
| 55  | 1,278,342      | 1,353,443      | 5.87   | 460,167        | 64.00  |
| 56  | 1,223,898      | 1,246,745      | 1.87   | 1,840,668      | 50.39  |
| 57  | 1,170,828      | 1,209,962      | 3.34   | 1,840,668      | 57.21  |
| 58  | 1,118,823      | 1,045,996      | 6.51   | 920,334        | 17.74  |
| 59  | 1,075,668      | 1,107,593      | 2.97   | 2,147,446      | 99.64  |
| 60  | 1,030,717      | 1,073,627      | 4.16   | 1,227,112      | 19.05  |
| 61  | 990,754        | 903,223        | 8.83   | 920,334        | 7.11   |
| 62  | 951,823        | 998,730        | 4.93   | 1,687,279      | 77.27  |
| 63  | 914,881        | 910,683        | 0.46   | 153,389        | 83.23  |
|     |                | AVG            | 2.38   | AVG            | 17.34  |
|     |                | MAX            | 9.98   | MAX            | 99.64  |
|     |                | STDEV          | 2.54   | STDEV          | 22.58  |
